# Supplementary material for: Solvent-Induced Cobalt(II) Cyanoguanidine Bromides: Syntheses, Crystal Structure, Optical and Magnetic Properties
Source: MDPI journal article supplement (doi:10.3390/cryst12101377), 2022-09-28
Supplement: s1 [file s1]

## Supporting Information

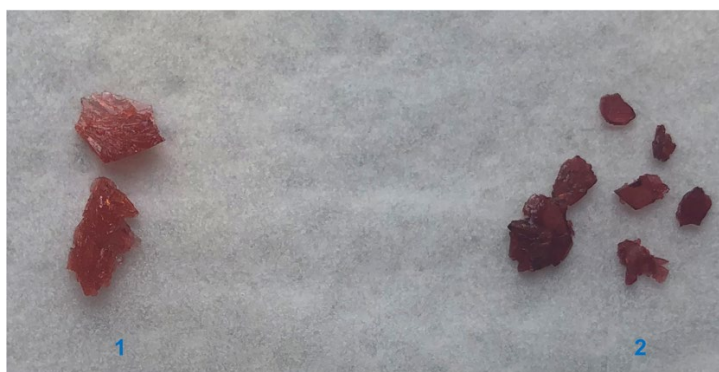

Figure S1 The bulk crystals of **1** and **2**.

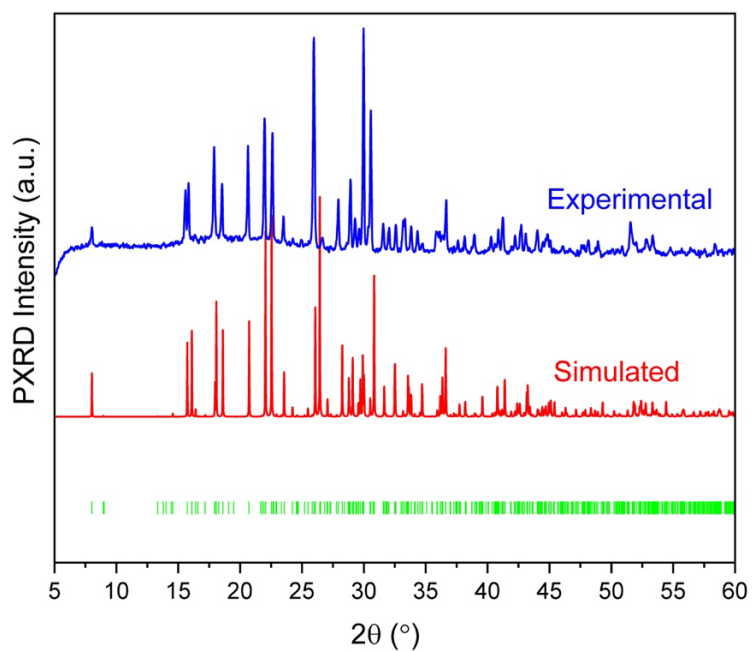

Figure S2 Experimental and simulated powder X-ray diffraction patterns for **1** with Bragg positions denoted by green vertical markers.

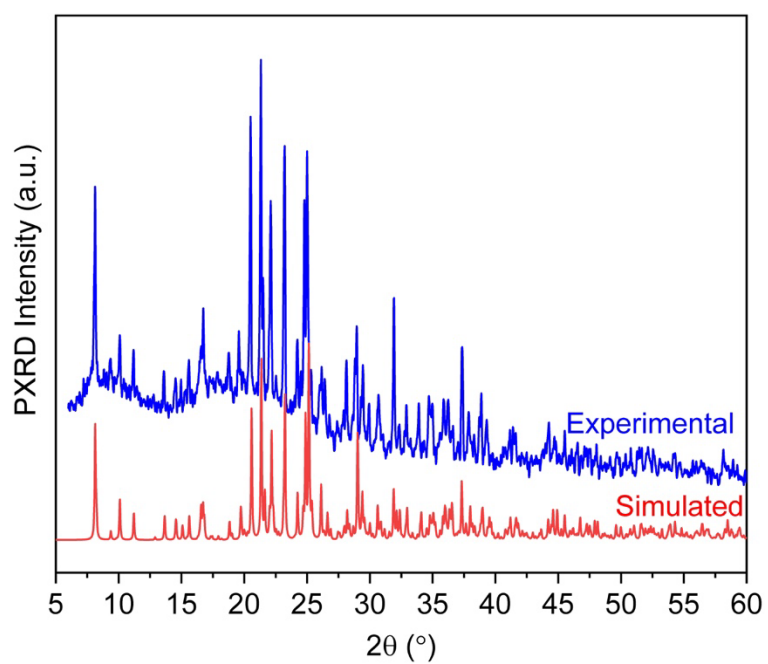

Figure S3 Same as before but for **2**.

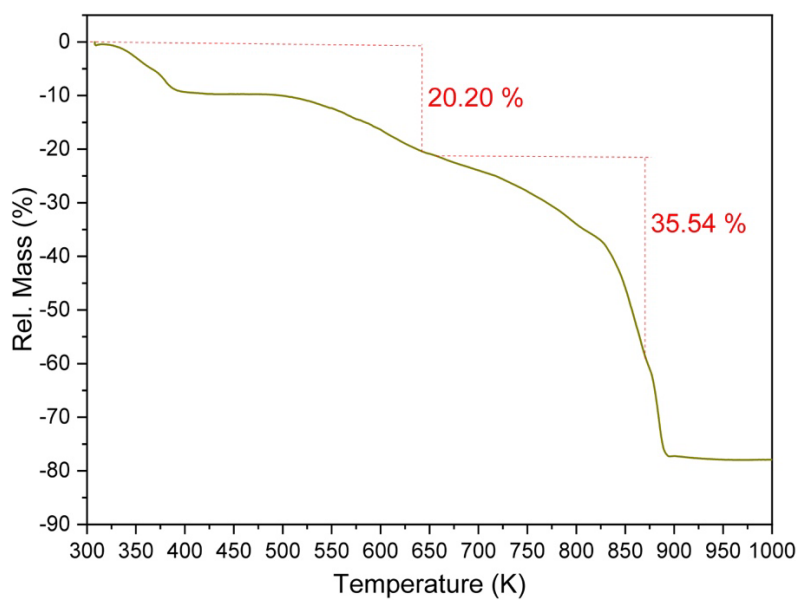

Figure S4 TGA curve for **1** with a heating rate of 5 K/min.

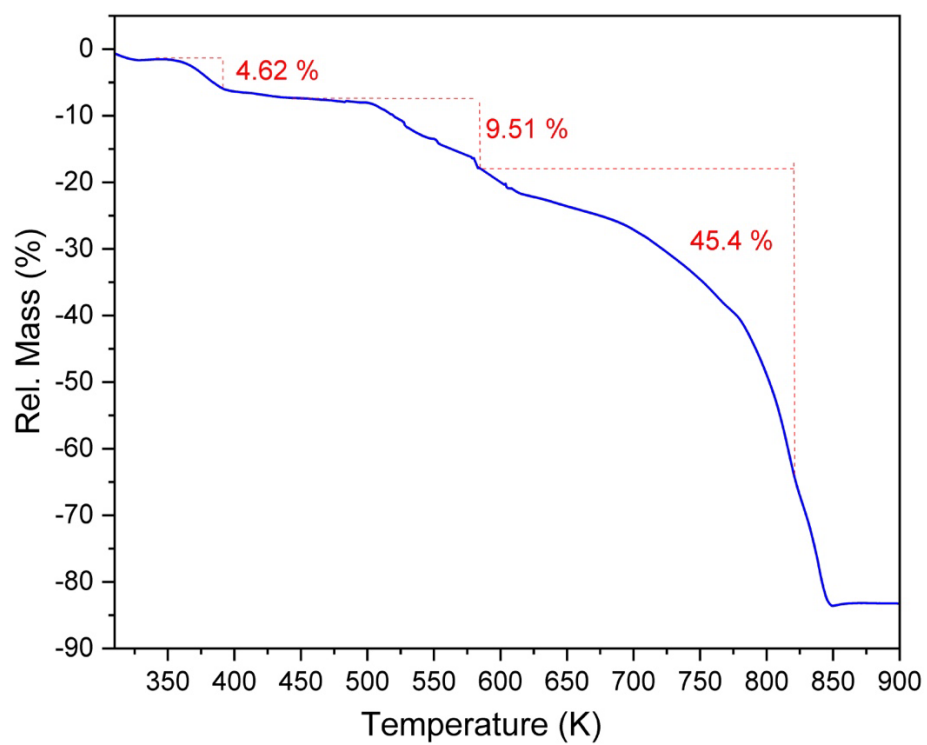

Figure S5 Same as before but for 2.

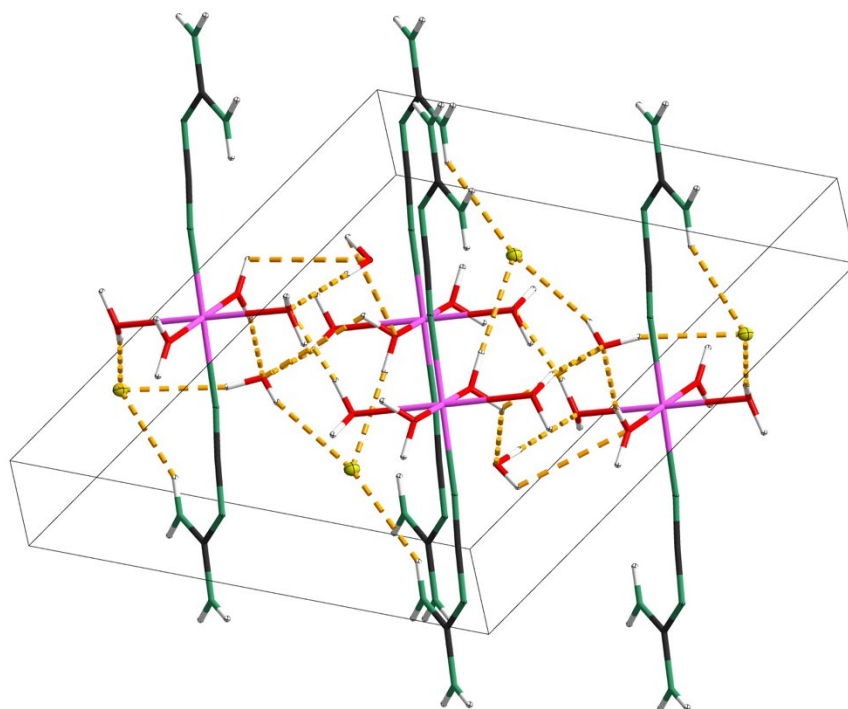

Figure S6 Hydrogen-bonding interactions between O, N and Br atoms in the crystal structure of 1.

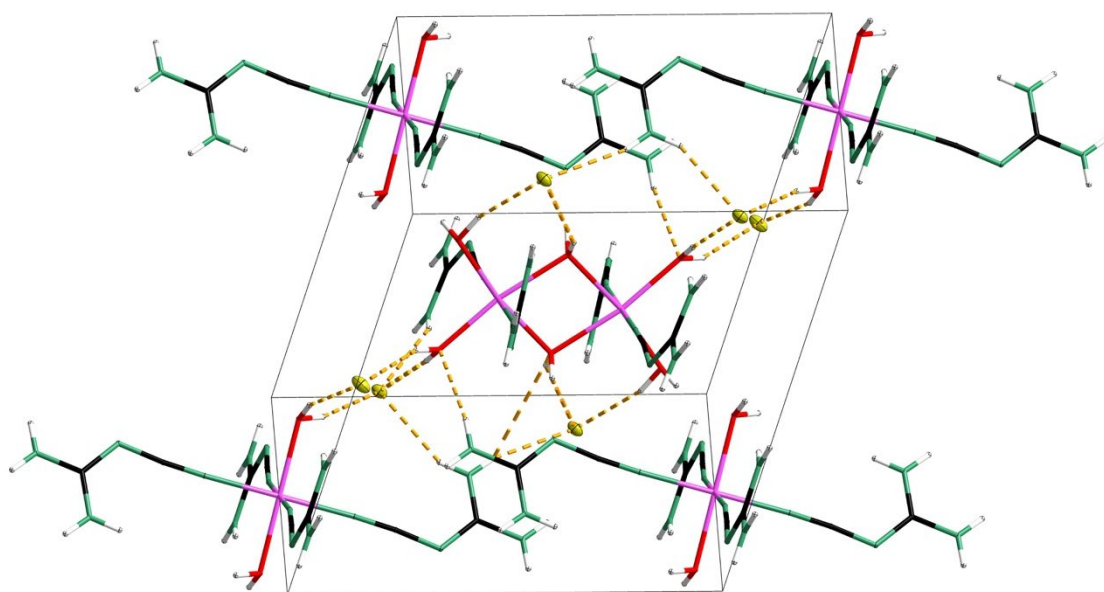

Figure S7 Same as before but for **2**.

Table S1 Assignment of Thermal Mass Loss Steps of **1**.

|           |                                                            | <b>1</b> |
|-----------|------------------------------------------------------------|----------|
| 293–600 K | calculated (crystal water and coordinated water molecules) | 21.82 %  |
|           | observed                                                   | 20.20 %  |
| 600–850 K | calculated (ligands)                                       | 33.94 %  |
|           | observed                                                   | 35.54 %  |

Table S2 As before but for **2**.

|           |                                          | <b>2</b> |
|-----------|------------------------------------------|----------|
| 400–600 K | calculated (coordinated water molecules) | 9.78 %   |
|           | observed                                 | 9.51 %   |
| 600–850 K | calculated (ligands)                     | 45.62 %  |
|           | observed                                 | 45.4 %   |

Table S3 Crystal data and structure refinement for **1** and **2**.

|                                                      | <b>1</b>                                                                                                                                                                | <b>2</b>                                                                                                                                                                 |
|------------------------------------------------------|-------------------------------------------------------------------------------------------------------------------------------------------------------------------------|--------------------------------------------------------------------------------------------------------------------------------------------------------------------------|
| Empirical formula                                    | Co(C <sub>2</sub> N <sub>4</sub> H <sub>4</sub> ) <sub>2</sub> (H <sub>2</sub> O) <sub>4</sub> ·2Br·2H <sub>2</sub> O                                                   | Co <sub>3</sub> (C <sub>2</sub> N <sub>4</sub> H <sub>4</sub> ) <sub>8</sub> (H <sub>2</sub> O) <sub>8</sub> ·6Br                                                        |
| Formula weight                                       | 495.03                                                                                                                                                                  | 1473.11                                                                                                                                                                  |
| Temperature / K                                      | 100                                                                                                                                                                     | 100                                                                                                                                                                      |
| Crystal system                                       | Triclinic                                                                                                                                                               | Triclinic                                                                                                                                                                |
| Space group                                          | <i>P</i> $\bar{1}$                                                                                                                                                      | <i>P</i> $\bar{1}$                                                                                                                                                       |
| Unit cell dimensions (Å)                             | <i>a</i> = 6.946(2)<br><i>b</i> = 11.173(3)<br><i>c</i> = 12.485(3)<br>$\alpha$ = 114.642(4) $^\circ$<br>$\beta$ = 98.284(4) $^\circ$<br>$\gamma$ = 100.028(4) $^\circ$ | <i>a</i> = 10.731(2)<br><i>b</i> = 11.658(2)<br><i>c</i> = 12.318(2)<br>$\alpha$ = 94.173(3) $^\circ$<br>$\beta$ = 114.733(3) $^\circ$<br>$\gamma$ = 108.593(3) $^\circ$ |
| <i>V</i> (Å <sup>3</sup> )                           | 841.5(3)                                                                                                                                                                | 1288.0(3)                                                                                                                                                                |
| <i>Z</i> , $\rho_{\text{cal}}$ (g cm <sup>-3</sup> ) | 2, 1.954                                                                                                                                                                | 1, 1.899                                                                                                                                                                 |
| Absorption coefficient, mm <sup>-1</sup>             | 5.804                                                                                                                                                                   | 5.678                                                                                                                                                                    |
| <i>F</i> (000)                                       | 490.0                                                                                                                                                                   | 723.0                                                                                                                                                                    |
| Theta range (°)                                      | 3.7–62.052                                                                                                                                                              | 3.75–55.132                                                                                                                                                              |
| Limiting indices                                     | $-9 \leq h \leq 9$<br>$-14 \leq k \leq 15$<br>$-17 \leq l \leq 8$                                                                                                       | $-13 \leq h \leq 12$<br>$-15 \leq k \leq 15$<br>$-15 \leq l \leq 16$                                                                                                     |
| Reflections collected/unique                         | 6894 / 4753 ( <i>R</i> <sub>int</sub> = 0.0165)                                                                                                                         | 9103 / 5894 ( <i>R</i> <sub>int</sub> = 0.0570)                                                                                                                          |
| Observed [ <i>I</i> > 2σ( <i>I</i> )]                | 3947                                                                                                                                                                    | 3753                                                                                                                                                                     |
| Absorption correction                                | Multi-scan (SADABS)                                                                                                                                                     |                                                                                                                                                                          |
| <i>T</i> <sub>min</sub> / <i>T</i> <sub>max</sub>    | 0.7461 / 0.6523                                                                                                                                                         | 0.7456 / 0.5690                                                                                                                                                          |
| Completeness (%)                                     | 99.4                                                                                                                                                                    | 99.7                                                                                                                                                                     |
| Data / restraints / parameters                       | 4753 / 31 / 253                                                                                                                                                         | 5894 / 4 / 313                                                                                                                                                           |
| Goodness                                             | 1.080                                                                                                                                                                   | 0.977                                                                                                                                                                    |
| Final <i>R</i> indexes [ <i>I</i> ≥ 2σ( <i>I</i> )]  | <i>R</i> <sub>1</sub> = 0.0315, <i>wR</i> <sub>2</sub> = 0.0724                                                                                                         | <i>R</i> <sub>1</sub> = 0.0601, <i>wR</i> <sub>2</sub> = 0.1088                                                                                                          |
| Final <i>R</i> indexes (all data)                    | <i>R</i> <sub>1</sub> = 0.0392, <i>wR</i> <sub>2</sub> = 0.0771                                                                                                         | <i>R</i> <sub>1</sub> = 0.1058, <i>wR</i> <sub>2</sub> = 0.1324                                                                                                          |
| Largest diff. peak and hole / e Å <sup>-3</sup>      | 0.70 / -0.80                                                                                                                                                            | 1.20 / -1.22                                                                                                                                                             |

Table S4 Elemental CHN analysis for **1**.

|              | C (wt%) | H (wt%) | N (wt%) |
|--------------|---------|---------|---------|
| Experimental | 10.01   | 3.83    | 23.73   |
| Calculated   | 9.71    | 4.07    | 22.64   |

Table S5 Bond lengths for **1**.

| Atom | Atom            | Length (Å) | Atom | Atom | Length (Å) |
|------|-----------------|------------|------|------|------------|
| Co1  | O2 <sup>1</sup> | 2.180(2)   | Co2  | N8   | 2.091(2)   |
| Co1  | O2              | 2.180(2)   | N3   | C2   | 1.311(3)   |
| Co1  | O1 <sup>1</sup> | 2.046(2)   | N3   | C1   | 1.341(3)   |
| Co1  | O1              | 2.046(2)   | N7   | C4   | 1.311(3)   |
| Co1  | N4              | 2.087(2)   | N7   | C3   | 1.341(3)   |

|     |                 |          |    |    |          |
|-----|-----------------|----------|----|----|----------|
| Co1 | N4 <sup>1</sup> | 2.087(2) | N1 | C1 | 1.335(3) |
| Co2 | O3              | 2.142(2) | N4 | C2 | 1.164(3) |
| Co2 | O3 <sup>2</sup> | 2.142(2) | N2 | C1 | 1.337(3) |
| Co2 | O4              | 2.056(2) | N8 | C4 | 1.158(3) |
| Co2 | O4 <sup>2</sup> | 2.056(2) | N5 | C3 | 1.333(3) |
| Co2 | N8 <sup>2</sup> | 2.091(2) | N6 | C3 | 1.335(3) |

<sup>1</sup> 2-x, 1-y, 1-z; <sup>2</sup> 1-x, -y, 1-z

Table S6 Elemental CHN analysis for **2**.

|              | C (wt%) | H (wt%) | N (wt%) |
|--------------|---------|---------|---------|
| Experimental | 12.83   | 2.99    | 30.15   |
| Calculated   | 13.04   | 3.08    | 30.43   |

Table S7 Bond lengths for **2**.

| Atom | Atom             | Length (Å) | Atom | Atom | Length (Å) |
|------|------------------|------------|------|------|------------|
| Co2  | O4 <sup>1</sup>  | 2.136(5)   | N3   | C1   | 1.347(9)   |
| Co2  | O4               | 2.136(5)   | N14  | C7   | 1.296(9)   |
| Co2  | N12              | 2.118(6)   | N14  | C8   | 1.353(8)   |
| Co2  | N12 <sup>1</sup> | 2.118(6)   | N9   | C5   | 1.331(10)  |
| Co2  | N13 <sup>1</sup> | 2.072(6)   | N13  | C7   | 1.165(8)   |
| Co2  | N13              | 2.072(6)   | N15  | C8   | 1.341(9)   |
| Co1  | O3 <sup>2</sup>  | 2.218(5)   | N16  | C8   | 1.311(9)   |
| Co1  | O3               | 2.156(5)   | N11  | C6   | 1.303(10)  |
| Co1  | O2               | 2.073(4)   | N11  | C5   | 1.359(9)   |
| Co1  | O1               | 2.048(5)   | N8   | C4   | 1.319(9)   |
| Co1  | N5               | 2.062(6)   | N10  | C5   | 1.327(10)  |
| Co1  | N4               | 2.064(6)   | N6   | C3   | 1.303(9)   |
| N5   | C3               | 1.143(9)   | N6   | C4   | 1.372(9)   |
| N4   | C2               | 1.167(8)   | N1   | C1   | 1.327(9)   |
| N12  | C6               | 1.165(9)   | N2   | C1   | 1.342(9)   |
| N3   | C2               | 1.296(9)   | N7   | C4   | 1.326(9)   |

<sup>1</sup> 2-x, 2-y, 1-z; <sup>2</sup> 1-x, 1-y, 1-z

Table S8 IR bands of cyanoguanidine, **1** and **2**.

| Vibration                     | CNGE                       | <b>1</b>                   | <b>2</b>                   |
|-------------------------------|----------------------------|----------------------------|----------------------------|
| $\nu(\text{C}\equiv\text{N})$ | 2208–2163 cm <sup>-1</sup> | 2224–2179 cm <sup>-1</sup> | 2234–2189 cm <sup>-1</sup> |
| $\nu(\text{C}=\text{N})$      | 1629 cm <sup>-1</sup>      | 1655 cm <sup>-1</sup>      | 1637 cm <sup>-1</sup>      |
| $\nu(\text{NH})$              | 3429 cm <sup>-1</sup>      | 3529 cm <sup>-1</sup>      | 3432 cm <sup>-1</sup>      |
